# Supplementary material
Source: Elsevier journal article supplement (https://www.sciencedirect.com/science/article/pii/S2530016421001889)
Supplement: mmc1 [file S2530016421001889:mmc1.doc]

**Supplementary material**

**Management of Primary Hypothyroidism in Adults: An Analysis of the Results of a Survey in 546 Primary Care Physicians**

**Juan J. Díez1,2,3, Pedro Iglesias1,2 and María Ángeles Gómez-Mateos2,4**

**1Department of Endocrinology, Hospital Universitario Puerta de Hierro Majadahonda, Madrid, Spain**

**2Instituto de Investigación Sanitaria Puerta de Hierro Segovia de Arana. Madrid, Spain**

**3Department of Medicine, Universidad Autónoma de Madrid, Spain**

**4Medical Direction, Hospital Universitario Puerta de Hierro Majadahonda, Madrid, Spain**

**Supplementary Material. Table S1**. Survey sent to primary care physicians in Madrid and its English version

**ENCUESTA**

**1. DATOS DEMOGRÁFICOS Y PROFESIONALES**

**Pregunta 1.1.** Sexo

|  | Mujer |
| --- | --- |
|  | Hombre |

**Pregunta 1.2.** Edad y años de ejercicio (respuesta numérica)

|  | Edad en años |
| --- | --- |
|  | Años de ejercicio profesional de la Medicina |

**Pregunta 1.3.** Área Sanitaria de la Comunidad de Madrid donde se desarrollas tu actividad profesional

|  | Dirección Asistencial Sur |
| --- | --- |
|  | Dirección Asistencial Norte |
|  | Dirección Asistencial Noroeste |
|  | Dirección Asistencial Este |
|  | Dirección Asistencial Oeste |
|  | Dirección Asistencial Centro |
|  | Dirección Asistencial Sureste |

**Pregunta 1.4.** Por favor, indica qué otras actividades realizas aparte de la práctica clínica (puede contestarse más de una opción)

|  | Actividad docente |
| --- | --- |
|  | Actividad investigadora |
|  | Actividad de gestión |

**Pregunta 1.5.** Por favor, indica el número aproximado de pacientes con hipotiroidismo que atiendes en un año (respuesta numérica)

|  | Pacientes con hipotiroidismo de reciente diagnóstico |
| --- | --- |
|  | Pacientes con hipotiroidismo en seguimiento |

**2. CRIBADO DEL HIPOTIROIDISMO**

Por favor, antes de contestar ten en cuenta las siguientes consideraciones:

- No pretendemos examinar tus conocimientos, sino que todas las preguntas tratan de explorar tu actitud ante pacientes hipotiroideos en tu práctica clínica habitual.
- Todas las preguntas se refieren a pacientes con hipotiroidismo primario en adultos, excluyendo mujeres embarazadas.
- Ninguna pregunta hace referencia al hipotiroidismo secundario o al hipotiroidismo en la gestación.
- En todos los casos se considera que el intervalo de normalidad para la determinación de tirotropina (TSH) es de 0,5 a 5,0 mcU/ml.
- En todos los casos el hipotiroidismo subclínico se define como TSH >5 mcU/ml con T4 libre normal, y el hipotiroidismo franco como TSH>5 mcU/ml con T4 libre baja.

**Pregunta 2.1.** En mi práctica clínica habitual solicito una determinación de TSH en las siguientes situaciones (señalar sí o no en cada afirmación):

| Sí | No |  |
| --- | --- | --- |
|  |  | Mujeres mayores de 60 años |
|  |  | Hombres mayores de 60 años |
|  |  | Pacientes con enfermedades autoinmunes no tiroideas |
|  |  | Pacientes con dislipemia conocida previamente |
|  |  | Pacientes a los que solicito un perfil lipídico aun sin saber si tendrán dislipemia |
|  |  | Pacientes con diabetes mellitus |
|  |  | Pacientes con historia familiar de enfermedad tiroidea |
|  |  | Pacientes que refieren astenia, aumento de peso y estreñimiento |
|  |  | Sujetos sanos a los que solicito una analítica de rutina en un examen de salud |

**3. DIAGNÓSTICO DEL HIPOTIROIDISMO**

**Pregunta 3.1.** Cuando diagnostico un hipotiroidismo subclínico (elevación de TSH con T4 libre normal) solicito las siguientes pruebas complementarias para completar el estudio (señalar sí o no en cada afirmación):

| Sí | No |  |
| --- | --- | --- |
|  |  | Solicito una segunda determinación de TSH y T4 libre |
|  |  | Anticuerpos anti-tiroideos |
|  |  | Perfil lipídico |
|  |  | Ecografía tiroidea |
|  |  | Gammagrafía tiroidea |

**Pregunta 3.2.** Cuando diagnostico un hipotiroidismo franco (elevación de TSH con T4 libre baja) solicito las siguientes pruebas complementarias para completar el estudio (señalar sí o no en cada afirmación):

| Sí | No |  |
| --- | --- | --- |
|  |  | Solicito una segunda determinación de TSH y T4 libre |
|  |  | Anticuerpos anti-tiroideos |
|  |  | Perfil lipídico |
|  |  | Ecografía tiroidea |
|  |  | Gammagrafía tiroidea |

**4. TRATAMIENTO DEL HIPOTIROIDISMO**

**Pregunta 4.1.** En mi práctica clínica habitual (señalar una sola respuesta):

|  | Yo trato el hipotiroidismo subclínico y remito al especialista el hipotiroidismo franco |
| --- | --- |
|  | Yo trato la mayoría de mis pacientes con hipotiroidismo subclínico e hipotiroidismo franco, sólo remito al especialista casos con especial dificultad |
|  | Yo inicio el tratamiento del hipotiroidismo en general, pero lo envío al especialista para completar estudio y confirmar el tratamiento |
|  | Yo no inicio el tratamiento de mis pacientes con hipotiroidismo franco o subclínico, consulto siempre al especialista para que inicie el tratamiento |

Si a la pregunta anterior has contestado *Yo no inicio el tratamiento de mis pacientes con hipotiroidismo franco o subclínico, consulto siempre al especialista*, por favor, pasa a la pregunta 5.1 de la sección **Control y seguimiento**. En caso contrario continúa aquí.

**Pregunta 4.2.** En mi práctica clínica habitual cuando encuentro un paciente con hipotiroidismo subclínico con TSH entre 5 y 10 mcU/ml (señalar una o varias):

|  | Lo trato con levotiroxina si tiene menos de 45 años |
| --- | --- |
|  | Lo trato con levotiroxina si tiene más de 65 años |
|  | Lo trato con levotiroxina si presenta anticuerpos anti-tiroideos positivos |
|  | Lo trato con levotiroxina si presenta síntomas de hipotiroidismo |
|  | Lo trato con levotiroxina si presenta dislipemia |
|  | Lo trato con levotiroxina si presenta diabetes |
|  | Lo trato con levotiroxina si presenta bocio palpable |
|  | No lo trato |

**Pregunta 4.3.** En mi práctica clínica habitual cuando encuentro un paciente con hipotiroidismo subclínico con TSH >10 mcU/ml (señalar una o varias):

|  | Lo trato con levotiroxina si tiene menos de 45 años |
| --- | --- |
|  | Lo trato con levotiroxina si tiene más de 65 años |
|  | Lo trato con levotiroxina si presenta anticuerpos anti-tiroideos positivos |
|  | Lo trato con levotiroxina si presenta síntomas de hipotiroidismo |
|  | Lo trato con levotiroxina si presenta dislipemia |
|  | Lo trato con levotiroxina si presenta diabetes |
|  | Lo trato con levotiroxina si presenta bocio palpable |
|  | No lo trato |

**Pregunta 4.4.** En mi práctica clínica habitual, cuando inicio el tratamiento con levotiroxina para el hipotiroidismo franco en un paciente adulto de menor de 45 años, sin cardiopatía isquémica (señalar una sola respuesta):

|  | Comienzo con dosis bajas con ascenso progresivo según respuesta de TSH |
| --- | --- |
|  | Comienzo con dosis plena ajustada al peso (aproximadamente 1,6 mcg/kg de peso y día) |
|  | Comienzo con dosis plena de forma empírica (p. ej., 75-100 mcg/día) |

**Pregunta 4.5.** En mi práctica clínica habitual, cuando inicio el tratamiento con levotiroxina para el hipotiroidismo franco en un paciente adulto de edad comprendida entre 45 y 65 años, sin cardiopatía isquémica (señalar una sola respuesta):

|  | Comienzo con dosis bajas con ascenso progresivo según respuesta de TSH |
| --- | --- |
|  | Comienzo con dosis plena ajustada al peso (aproximadamente 1,6 mcg/kg de peso y día) |
|  | Comienzo con dosis plena de forma empírica (p. ej., 75-100 mcg/día) |

**Pregunta 4.6.** En mi práctica clínica habitual, cuando inicio el tratamiento con levotiroxina para el hipotiroidismo franco en un paciente adulto de más de 65 años, sin cardiopatía isquémica (señalar una sola respuesta):

|  | Comienzo con dosis bajas con ascenso progresivo según respuesta de TSH |
| --- | --- |
|  | Comienzo con dosis plena ajustada al peso (aproximadamente 1,6 mcg/kg de peso y día) |
|  | Comienzo con dosis plena de forma empírica (p. ej., 75-100 mcg/día) |

**Pregunta 4.7.** En mi práctica clínica habitual, cuando inicio el tratamiento con levotiroxina para el hipotiroidismo franco o subclínico en un paciente adulto de cualquier edad (señalar sí o no en cada afirmación):

| Sí | No |  |
| --- | --- | --- |
|  |  | Recomiendo tomar el comprimido con estómago vacío, 20-30 min antes del desayuno |
|  |  | Recomiendo que no se tomen otras medicaciones con la tiroxina, especialmente antiácidos, calcio y hierro |

**Pregunta 4.8.** Cuando prescribo levotiroxina a un paciente que inicia tratamiento para el hipotiroidismo (señalar una sola respuesta):

|  | Utilizo preferentemente un preparado de marca |
| --- | --- |
|  | Utilizo preferentemente una especialidad farmacéutica genérica |

**5. CONTROL Y SEGUIMIENTO**

**Pregunta 5.1.** En mi práctica clínica habitual, el objetivo del tratamiento del hipotiroidismo en mis pacientes de menos de 45 años es aliviar los síntomas y conseguir (señalar una sola respuesta):

|  | TSH entre 0,5 y 5,0 mcU/ml (intervalo de referencia) |
| --- | --- |
|  | TSH entre 0,5 y 2,5-3,0 mcU/ml (mitad inferior del intervalo de referencia) |

**Pregunta 5.2.** En mi práctica clínica habitual, el objetivo del tratamiento del hipotiroidismo en mis pacientes de 45 a 65 años es aliviar los síntomas y conseguir (señalar una sola respuesta):

|  | TSH entre 0,5 y 5,0 mcU/ml (intervalo de referencia) |
| --- | --- |
|  | TSH entre 0,5 y 2,5-3,0 mcU/ml (mitad inferior del intervalo de referencia) |

**Pregunta 5.3.** En mi práctica clínica habitual, el objetivo del tratamiento del hipotiroidismo en mis pacientes mayores de 65 años es aliviar los síntomas y conseguir (señalar una sola respuesta):

|  | TSH entre 0,5 y 5,0 mcU/ml (intervalo de referencia) |
| --- | --- |
|  | TSH entre 0,5 y 2,5-3,0 mcU/ml (mitad inferior del intervalo de referencia) |

**Pregunta 5.4.** En mi práctica clínica el primer control analítico de un paciente hipotiroideo tras iniciar el tratamiento con levotiroxina lo realizo al cabo de (señalar una sola respuesta):

|  | Dos semanas |
| --- | --- |
|  | Un mes |
|  | Dos meses |
|  | Tres meses |
|  | Seis meses |
|  | Más de 6 meses |

**Pregunta 5.5.** En este primer control analítico solicito (señalar una o varias respuestas):

|  | TSH |
| --- | --- |
|  | T4 libre |
|  | T3 libre |
|  | Anticuerpos anti-tiroideos |

**Pregunta 5.6.** En este primer control analítico indico al paciente (señalar una o varias respuestas):

|  | Que vaya en ayunas |
| --- | --- |
|  | Que puede desayunar antes de la extracción |
|  | Que puede tomar el comprimido de levotiroxina antes de la extracción |
|  | Que no tome el comprimido de levotiroxina hasta que le hayan extraído la muestra de sangre |

**Pregunta 5.7.** En un paciente estable que presenta un buen control analítico de su hipotiroidismo (TSH normal con tratamiento sustitutivo), sin problemas clínicos añadidos, programo los controles de TSH (señalar una sola):

|  | Cada 3 meses |
| --- | --- |
|  | Cada 6 meses |
|  | Cada año |
|  | Cada 2 años |

**Pregunta 5.8.** En un paciente estable que presenta un buen control analítico de su hipotiroidismo (TSH normal con tratamiento sustitutivo), pero que presenta síntomas persistentes de hipotiroidismo (señalar una o varias):

|  | Lo remito al especialista en Endocrinología |
| --- | --- |
|  | Realizo pruebas complementarias para buscar otras causas de los síntomas |
|  | Cambio de preparado comercial de levotiroxina |
|  | Cambio la levotiroxina por tratamiento combinado con levotiroxina + T3 |
|  | Hago una prueba terapéutica elevando la dosis de levotiroxina |

**SURVEY**

**(English version)**

**1. DEMOGRAPHIC AND PROFESSIONAL DATA**

**Question 1.1.** Gender

|  | Female |
| --- | --- |
|  | Male |

**Question 1.2.** Age and years of profesional practice (numerical answer)

|  | Age |
| --- | --- |
|  | Years of professional practice |

**Question 1.3.** Sanitary Area of the Community of Madrid where you carry out your professional activity

|  | Dirección Asistencial South |
| --- | --- |
|  | Dirección Asistencial North |
|  | Dirección Asistencial Northwest |
|  | Dirección Asistencial East |
|  | Dirección Asistencial West |
|  | Dirección Asistencial Center |
|  | Dirección Asistencial Southeast |

**Question 1.4.** Please indicate what other activities you do apart from clinical practice (more than one option can be answered)

|  | Teaching activity |
| --- | --- |
|  | Research activity |
|  | Management activity |

**Question 1.5.** Please indicate the approximate number of patients with hypothyroidism that you see in one year (numerical answer)

|  | Patients with newly diagnosed hypothyroidism |
| --- | --- |
|  | Patients with hypothyroidism in follow-up |

**2. DETECTION OF HYPOTHYROIDISM**

Please, before answering, take into account the following considerations:

- We do not intend to examine your knowledge. All the questions try to explore your attitude towards hypothyroid patients in your usual clinical practice.
- All questions refer to patients with primary hypothyroidism in adults, excluding pregnant women.
- No question refers to secondary hypothyroidism or hypothyroidism in pregnancy.
- In all cases, the normal range for the determination of thyrotropin (TSH) is considered to be 0.5 to 5.0 mcU/ml.
- In all cases, subclinical hypothyroidism is defined as TSH> 5 mcU / ml with normal free T4, and overt hypothyroidism as TSH> 5 mcU / ml with low free T4.

**Question 2.1.** In my usual clinical practice, I request a serum TSH determination in the following situations (indicate yes or no in each statement):

| Yes | No |  |
| --- | --- | --- |
|  |  | Women older than 60 years |
|  |  | Men older than 60 years |
|  |  | Patients with non-thyroid autoimmune diseases |
|  |  | Patients with previously known dyslipidemia |
|  |  | Patients for whom I request a lipid profile even without knowing if they will have dyslipidemia |
|  |  | Patients with diabetes |
|  |  | Patients with a family history of thyroid disease |
|  |  | Patients reporting asthenia, weight gain, and constipation |
|  |  | Healthy subjects to whom I request a routine analysis in a health examination |

**3. DIAGNOSIS OF HYPOTHYROIDISM**

**Question 3.1.** When I diagnose subclinical hypothyroidism (elevated TSH with normal free T4) I request the following complementary tests to complete the evaluaton (indicate yes or no in each statement):

| Yes | No |  |
| --- | --- | --- |
|  |  | I request a second TSH and free T4 determination |
|  |  | Thyroid autoantibodies |
|  |  | Lipid profile |
|  |  | Thyroid ultrasound |
|  |  | Thyroid scintiscan |

**Question 3.2.** When I diagnose overt hypothyroidism (elevated TSH with low free T4) I request the following complementary tests to complete the evaluation (indicate yes or no in each statement):

| Yes | No |  |
| --- | --- | --- |
|  |  | I request a second TSH and free T4 determination |
|  |  | Thyroid autoantibodies |
|  |  | Lipid profile |
|  |  | Thyroid ultrasound |
|  |  | Thyroid scintiscan |

**4. TREATMENT OF HYPOTHYROIDISM**

**Question 4.1.** In my usual clinical practice (indicate only one answer):

|  | I treat subclinical hypothyroidism and to the specialist overt hypothyroidism |
| --- | --- |
|  | I treat most of my patients with subclinical and overt hypothyroidism, I only refer to the specialist cases with special difficulty |
|  | I start the treatment of hypothyroidism in general, but refer to the specialist to complete the study and confirm therapy |
|  | I do not start the treatment of my patients with overt or subclinical hypothyroidism, I always consult the specialist |

If you have answered the previous question *“I do not start the treatment of my patients with overt or subclinical hypothyroidism, I always consult the specialist”*, please go to question 5.1 of the Control and follow-up section. Otherwise continue here.

**Question 4.2.** In my usual clinical practice when I find a patient with subclinical hypothyroidism with TSH between 5 and 10 mcU/ml (indicate one or more):

|  | I treat with levothyroxine if he or she is under 45 |
| --- | --- |
|  | I treat with levothyroxine if he or she is over 65 |
|  | I treat with levothyroxine if he or she has positive thyroid antibodies |
|  | I treat with levothyroxine if he or she has symptoms of hypothyroidism |
|  | I treat with levothyroxine if he or she has dyslipidemia |
|  | I treat with levothyroxine if he or she has diabetes |
|  | I treat with levothyroxine if he or she has a palpable goiter |
|  | I don't treat |

**Question 4.3.** In my usual clinical practice when I find a patient with subclinical hypothyroidism with TSH >10 mcU / ml (indicate one or more):

|  | I treat with levothyroxine if he or she is under 45 |
| --- | --- |
|  | I treat with levothyroxine if he or she is over 65 |
|  | I treat with levothyroxine if he or she has positive thyroid antibodies |
|  | I treat with levothyroxine if he or she has symptoms of hypothyroidism |
|  | I treat with levothyroxine if he or she has dyslipidemia |
|  | I treat with levothyroxine if he or she has diabetes |
|  | I treat with levothyroxine if he or she has a palpable goiter |
|  | I don't treat |

**Question 4.4.** In my usual clinical practice, when I start treatment with levothyroxine for overt hypothyroidism in an adult patient under the age of 45, without ischemic heart disease (indicate only one answer):

|  | I start with low doses with progressive rise according to TSH response |
| --- | --- |
|  | I start with full replacement dose adjusted for weight (approximately 1.6 mcg/kg of weight per day) |
|  | I start with full replacement dose empirically (e.g., 75-100 mcg / day) |

**Question 4.5.** In my usual clinical practice, when I start treatment with levothyroxine for overt hypothyroidism in an adult patient aged between 45 and 65 years, without ischemic heart disease (indicate only one answer):

|  | I start with low doses with progressive rise according to TSH response |
| --- | --- |
|  | I start with full replacement dose adjusted for weight (approximately 1.6 mcg/kg of weight per day) |
|  | I start with full replacement dose empirically (e.g., 75-100 mcg / day) |

**Question 4.6.** In my usual clinical practice, when I start treatment with levothyroxine for overt hypothyroidism in an adult patient older than 65 years, without ischemic heart disease (indicate only one answer):

|  | I start with low doses with progressive rise according to TSH response |
| --- | --- |
|  | I start with full replacement dose adjusted for weight (approximately 1.6 mcg/kg of weight per day) |
|  | I start with full replacement dose empirically (e.g., 75-100 mcg / day) |

**Question 4.7.** In my usual clinical practice, when I start treatment with levothyroxine for overt or subclinical hypothyroidism in an adult patient of any age (indicate yes or no in each statement):

| Yes | No |  |
| --- | --- | --- |
|  |  | I recommend taking the tablet on an empty stomach, 20-30 min before breakfast |
|  |  | I recommend not taking other medications with thyroxine, especially antacids, calcium and iron |

**Question 4.8.** When I prescribe levothyroxine to a patient starting hypothyroidism treatment (indicate only one answer):

|  | I preferably use a brand-name preparation |
| --- | --- |
|  | I preferably use a generic pharmaceutical specialty |

**5. MONITORING AND FOLLOW-UP**

**Question 5.1.** In my usual clinical practice, the goal of treating hypothyroidism in my patients under 45 years of age is to alleviate symptoms and achieve (indicate only one answer):

|  | TSH between 0.5 and 5.0 mcU/ml (interval of reference) |
| --- | --- |
|  | TSH between 0.5 and 2.5-3.0 mcU/ml (lower half of the reference range) |

**Question 5.2.** In my usual clinical practice, the goal of treating hypothyroidism in my patients aged 45 to 65 years is to alleviate symptoms and achieve (indicate only one answer):

|  | TSH between 0.5 and 5.0 mcU/ml (interval of reference) |
| --- | --- |
|  | TSH between 0.5 and 2.5-3.0 mcU/ml (lower half of the reference range) |

**Question 5.3.** In my usual clinical practice, the goal of treating hypothyroidism in my patients older than 65 years is to alleviate symptoms and achieve (indicate only one answer):

|  | TSH between 0.5 and 5.0 mcU/ml (interval of reference) |
| --- | --- |
|  | TSH between 0.5 and 2.5-3.0 mcU/ml (lower half of the reference range) |

**Question 5.4.** In my clinical practice, the first analytical check of a hypothyroid patient after starting treatment with levothyroxine was carried out after (indicate only one answer):

|  | Two weeks |
| --- | --- |
|  | One month |
|  | Two months |
|  | Three months |
|  | Six months |
|  | More than 6 months |

**Question 5.5.** In this first analytical check, I request (indicate one or more answers):

|  | TSH |
| --- | --- |
|  | FreeT4 |
|  | Free T3 |
|  | Thyroid antibodies |

**Question 5.6.** In this first analytical check, I indicate the patient (indicate one or more responses):

|  | You must go on an empty stomach |
| --- | --- |
|  | You can have breakfast before sampling |
|  | You can take the levothyroxine tablet before sampling |
|  | You should not take the levothyroxine tablet until your blood sample has been drawn |

**Question 5.7.** In a stable patient who has good analytical control of hypothyroidism (normal TSH with replacement treatment), with no added clinical problems, I program the TSH monitoring (indicate only one):

|  | Every 3 months |
| --- | --- |
|  | Every 6 months |
|  | Every year |
|  | Every 2 years |

**Question 5.8.** In a stable patient who has good analytical control of his hypothyroidism (normal TSH with replacement treatment), but who has persistent symptoms of hypothyroidism (indicate one or more):

|  | I refer you to the specialist in endocrinology |
| --- | --- |
|  | I request complementary investigations to look for other causes of symptoms |
|  | I change the trademark of levothyroxine |
|  | I change levothyroxine for combined treatment with levothyroxine + T3 |
|  | I do a therapeutic test by raising the dose of levothyroxine |
