# Supplementary material
Source: Elsevier journal article supplement (https://www.sciencedirect.com/science/article/pii/S2530016421001889)
Supplement: mmc2 [file S2530016421001889:mmc2.doc]

**Supplementary material**

**Management of Primary Hypothyroidism in Adults: An Analysis of the Results of a Survey in 546 Primary Care Physicians**

**Juan J. Díez1,2,3, Pedro Iglesias1,2 and María Ángeles Gómez-Mateos2,4**

**1Department of Endocrinology, Hospital Universitario Puerta de Hierro Majadahonda, Madrid, Spain**

**2Instituto de Investigación Sanitaria Puerta de Hierro Segovia de Arana. Madrid, Spain**

**3Department of Medicine, Universidad Autónoma de Madrid, Spain**

**4Medical Direction, Hospital Universitario Puerta de Hierro Majadahonda, Madrid, Spain**

**Supplementary Material. Table S2**. Demographic and professional features of 546 surveyed primary care physicians

|  | **All**  **(n=546)** | **Females**  **(n=404)** | **Males**  **(n=142)** |
| --- | --- | --- | --- |
| Age, yr | 50.9±8.5 | 50.3±8.5 | 52.4±8.3* |
| Time of professional practice, yr | 23.8±8.3 | 23.2±8.3 | 25.3±8.2** |
| Number of hypothyroid patients seen by year |  |  |  |
| Newly diagnosed | 7 (5-12) | 7 (5-12) | 7 (5-10) |
| In follow-up | 50 (30-90) | 50 (30-90) | 50 (30-90) |
| Non-assistance activities |  |  |  |
| Any | 352 (64.5) | 256 (63.4) | 96 (67.6) |
| Teaching activity | 298 (45.4) | 211 (54.7) | 77 (54.2) |
| Research activity | 98 (17.9) | 70 (17.3) | 28 (19.7) |
| Management activity | 71 (13.0) | 50 (12.4) | 231 (14.8) |
| Health area |  |  |  |
| South | 62 (11.4) | 50 (12.4) | 12 (8.5) |
| North | 67 (12.3) | 52 (12.9) | 15 (10.6) |
| Northwest | 80 (14.7) | 61 (15.1) | 19 (13.4) |
| East | 99 (18.1) | 80 (19.8) | 19 (13.4) |
| West | 61 (11.2) | 46 (11.4) | 15 (10.6) |
| Center | 70 (12.8) | 43 (10.6) | 27 (19.0) |
| Southeast | 107 (19.6) | 72 (17.8) | 35 (24.6) |

Data are the mean±SD or the median (interquartile range) for quantitative variables, and the number (percentage) for categorical variables.

*P<0.05; **P<0.01

**Supplementary Material. Table S3**. Complementary investigations that primary care physicians request after the biochemical diagnosis of subclinical and overt hypothyroidism in adult patients.

| **Complementary investigation** | **All** | **Gender** | | **Non-assistance activities** | | **Time of practice (yr)** | | **Patients in follow-up** | |
| --- | --- | --- | --- | --- | --- | --- | --- | --- | --- |
|  | **(546)** | **Female**  **(404)** | **Male**  **(142)** | **No**  **(194)** | **Yes**  **(352)** | **< 25**  **(258)** | **≥ 25**  **(288)** | **< 50**  **(238)** | **≥ 50**  **(279)** |
| **Subclinical hypothyroidism** |  |  |  |  |  |  |  |  |  |
| Repeated thyroid function tests | 480 (87.9) | 361 (89.4) | 119 (83.8) | 172 (88.7) | 308 (87.5) | **218 (84.5)** | **262 (91.0)*** | 213 (89.5) | 241 (86.4) |
| Thyroid autoantibodies | 452 (82.8) | 336 (83.2) | 116 (81.7) | 159 (82.0) | 293 (83.2) | **204 (79.1)** | **248 (86.1)*** | 204 (85.7) | 226 (81.0) |
| Lipid profile | 426 (78.0) | 322 (79.7) | 104 (73.2) | **140 (72.2)** | **286 (81.3)*** | **174 (67.4)** | **252 (87.5)***** | 191 (80.3) | 211 (75.6) |
| Thyroid ultrasound | 148 (27.1) | **119 (29.5)** | **29 (20.4)*** | 49 (25.3) | 99 (28.1) | **53 (20.5)** | **95 (33.0)**** | 69 (29.0) | 73 (26.2) |
| Thyroid scintigraphy | 13 (2.4) | 9 (2.2) | 4 (2.8) | 4 (2.1) | 9 (2.6) | 6 (2.3) | 7 (2.4) | 4 (1.7) | 8 (2.9) |
|  |  |  |  |  |  |  |  |  |  |
| **Overt hypothyroidism** |  |  |  |  |  |  |  |  |  |
| Repeated thyroid function tests | 460 (84.2) | 342 (84.7) | 118 (83.1) | 159 (82.0) | 301 (85.5) | 210 (81.4) | 250 (85.8) | 196 (82.4) | 236 (84.6) |
| Thyroid autoantibodies | 510 (93.4) | 380 (94.1) | 130 (91.5) | 177 (91.2) | 333 (94.6) | 237 (91.9) | 273 (94.8) | 222 (93.3) | 259 (92.8) |
| Lipid profile | 464 (85.0) | **351 (86.9)** | **113 (79.6)*** | **156 (80.4)** | **308 (87.5)*** | **207 (80.2)** | **257 (89.2)*** | 202 (84.9) | 236 (84.6) |
| Thyroid ultrasound | 380 (69.6) | **291 (72.0)** | **89 (62.7)*** | 135 (69.6) | 245 (69.6) | **166 (64.3)** | **214 (74.3)*** | 173 (72.7) | 167 (67.0) |
| Thyroid scintigraphy | 13 (2.4) | 10 (2.5) | 3 (2.1) | 4 (2.1) | 9 (2.6) | 6 (2.3) | 7 (2.4) | 5 (2.1) | 8 (2.9) |

Data are the number (percentage) of affirmative answers for each of the complementary investigations that physicians request after the biochemical diagnosis of subclinical or overt hypothyroidism.

Figures in parentheses in the headings of each column indicate the number of subjects in each group or subgroup.

Statistically significant differences (chi-square test) are highlighted in bold.

*P<0.05; **P<0.01; ***P<0.001.
